# Supplementary material
Source: Springer Nature journal article supplement (https://www.springermedizin.de/resource/supplementary/12889_2011_3875_MOESM2_ESM.pdf/9490448)

For Locn = 0.4142: 22 ite = 95.456 18 ite = 78.640

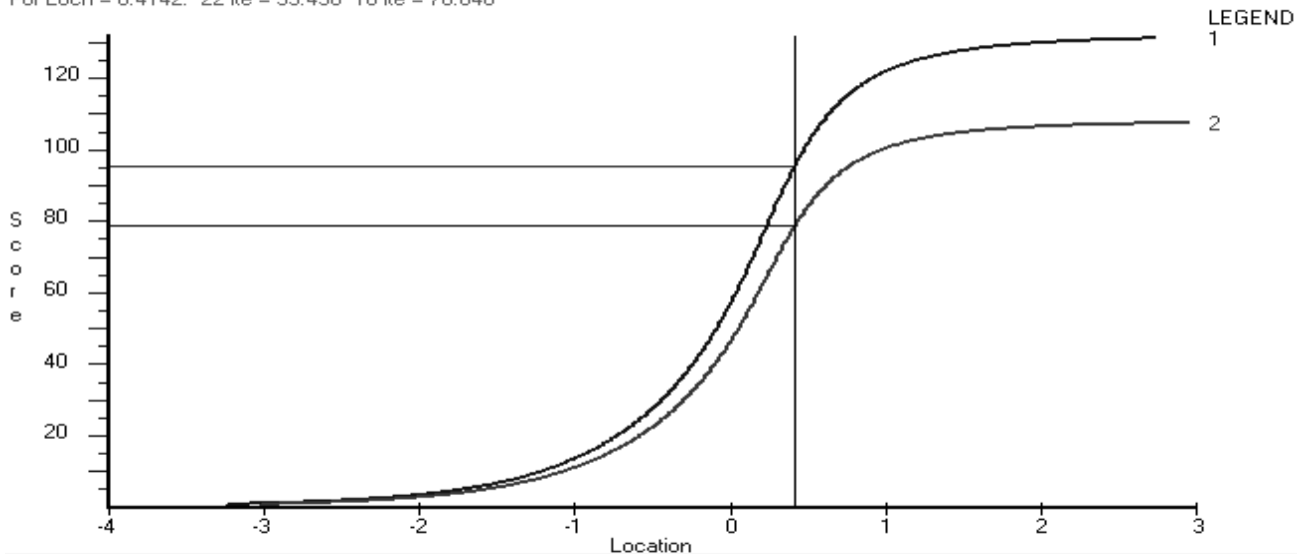

Supplement: MOESM2 [file 9490448]
